# Supplementary material
Source: PubMed Central journal article supplement (PMC6143143)
Supplement: NIHMS984776-supplement-1.pdf [file NIHMS984776-supplement-1.pdf]

## SUPPORTING INFORMATION

### The *Methanosarcina mazei* MM2060 gene encodes a bifunctional kinase/decarboxylase enzyme involved in cobamide biosynthesis

Norbert K. Tavares<sup>1</sup>, Carmen L. Zayas<sup>2§</sup>, and Jorge C. Escalante-Semerena<sup>1\*</sup>

<sup>1</sup>Department of Microbiology, University of Georgia, Athens, GA 30602, USA

<sup>2</sup>Department of Bacteriology, University of Wisconsin, Madison, 53706, USA

Running title: a new bifunctional archaeal L-Thr kinase / L-Thr-P decarboxylase

\*To whom correspondence should be addressed: Jorge C. Escalante-Semerena, Department of Microbiology, University of Georgia, 212C Biological Sciences Building, 120 Cedar Street, Athens, GA, 30602, USA. Phone: 706-542-2651, Fax: 706-542-2815 email: [jcescala@uga.edu](mailto:jcescala@uga.edu), [www.escalab.com](http://www.escalab.com)

§Current address: Aurora Medical Center, Summit WI 53066

**Keywords:** Bacterial metabolism, kinase, decarboxylase, coenzyme biosynthesis, zinc finger, B<sub>12</sub>

**SUPPORTING FIGURES**

Figure S1. Multiple sequence alignment of CobD from methanogenic archaea with CobD from *S. enterica* - Conserved residues are highlighted in red. Residues with similar properties are boxed in blue. The top row displays the secondary structure of the protein based on the crystal structure of CobD from *S. enterica*.

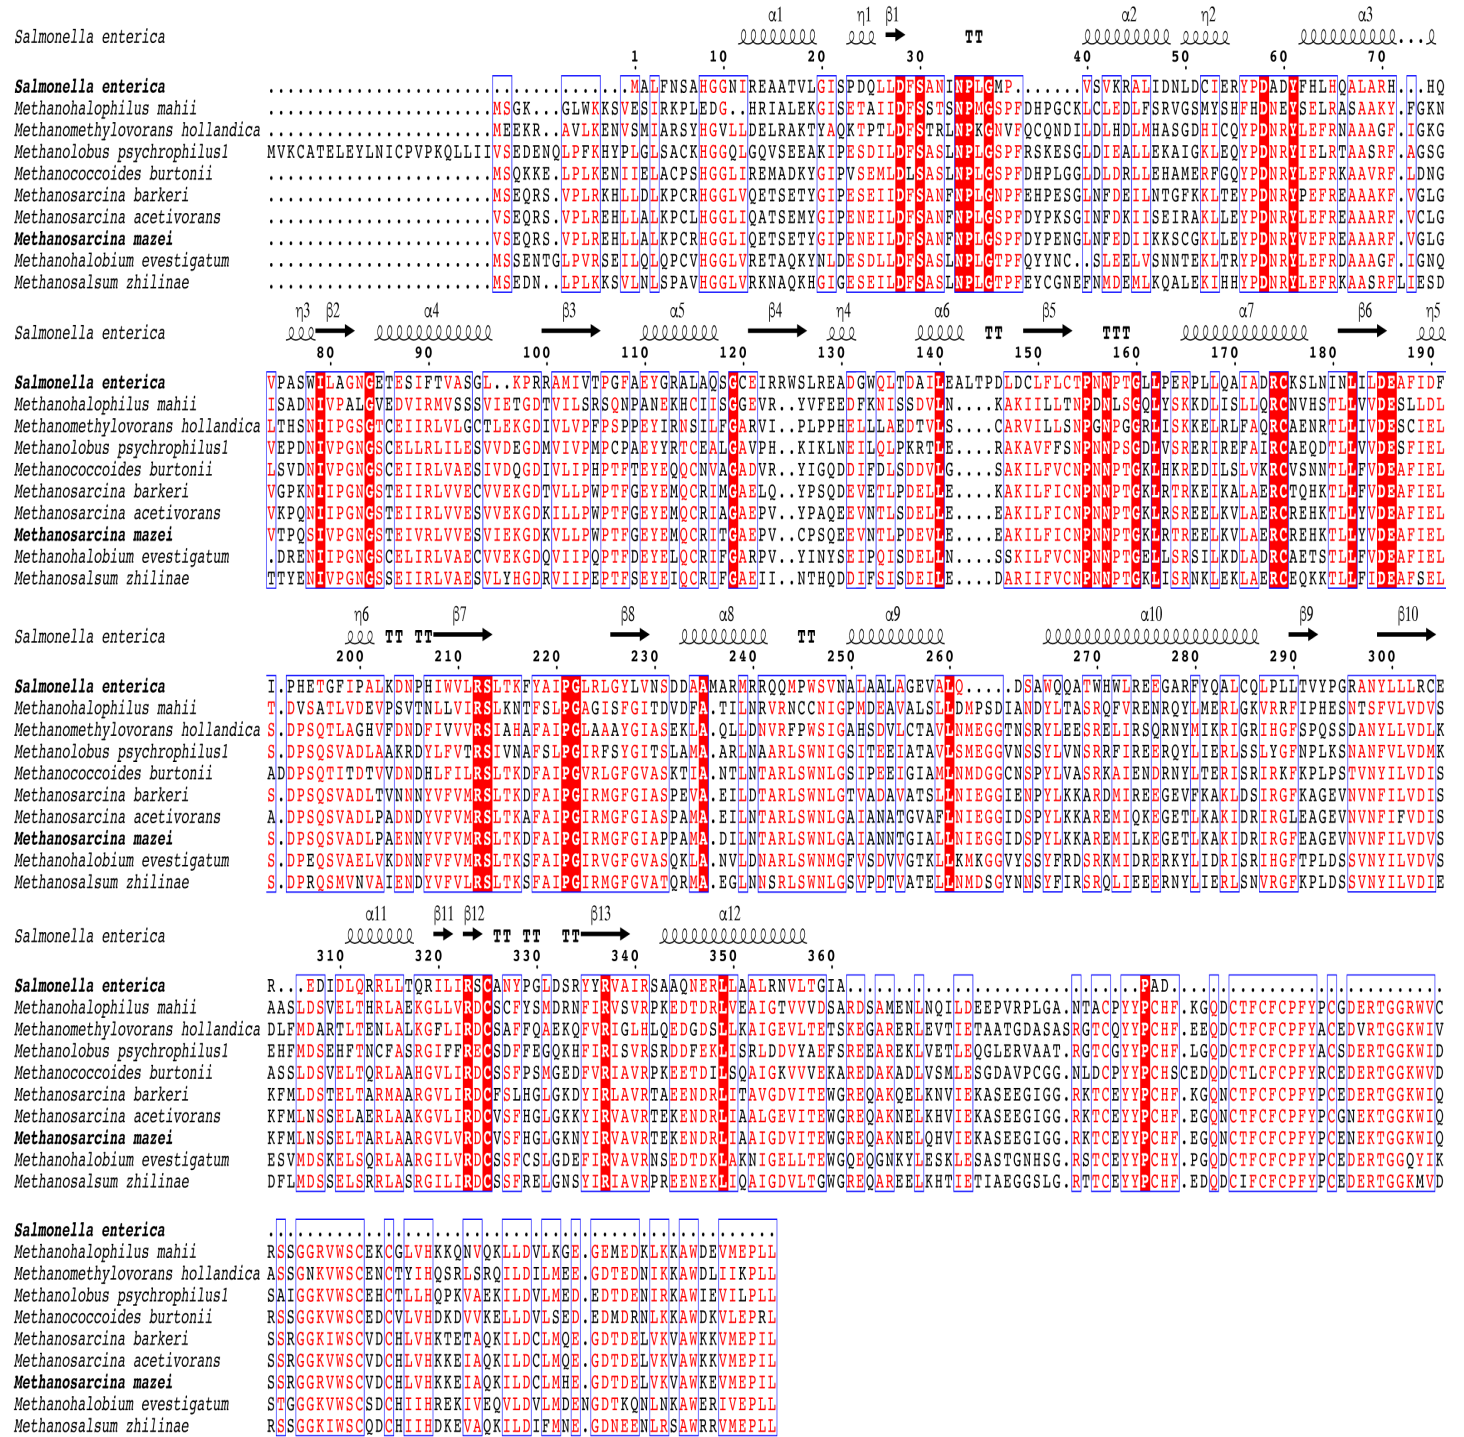

Figure S2. The intracellular concentration of Cby is the limiting factor for the complementation of *S. enterica* by *MmCobD* - Cobalamin-dependent growth was assessed in minimal medium supplemented with glycerol and Cby. Shown is the effect of increasing levels of Cby (1, 10, 20, and 50 nM) on the complementation of a *S. enterica cobD* strain with plasmids expressing (A) *MmCobD*<sup>1-385</sup> (pMmCOBD7) or (B) *MmCobD* (pMmCOBD18), relative to *SeCobD* (pCOBD6, black squares). Growth analysis was performed in duplicate independent experiments in three technical replicates with error bars indicating the standard error of the mean. Error bars are present but smaller than the symbols due to the low deviation between replicates in these representative growth curves. (C) Table of growth rates, lag times, and generation times as a function of Cby concentration.

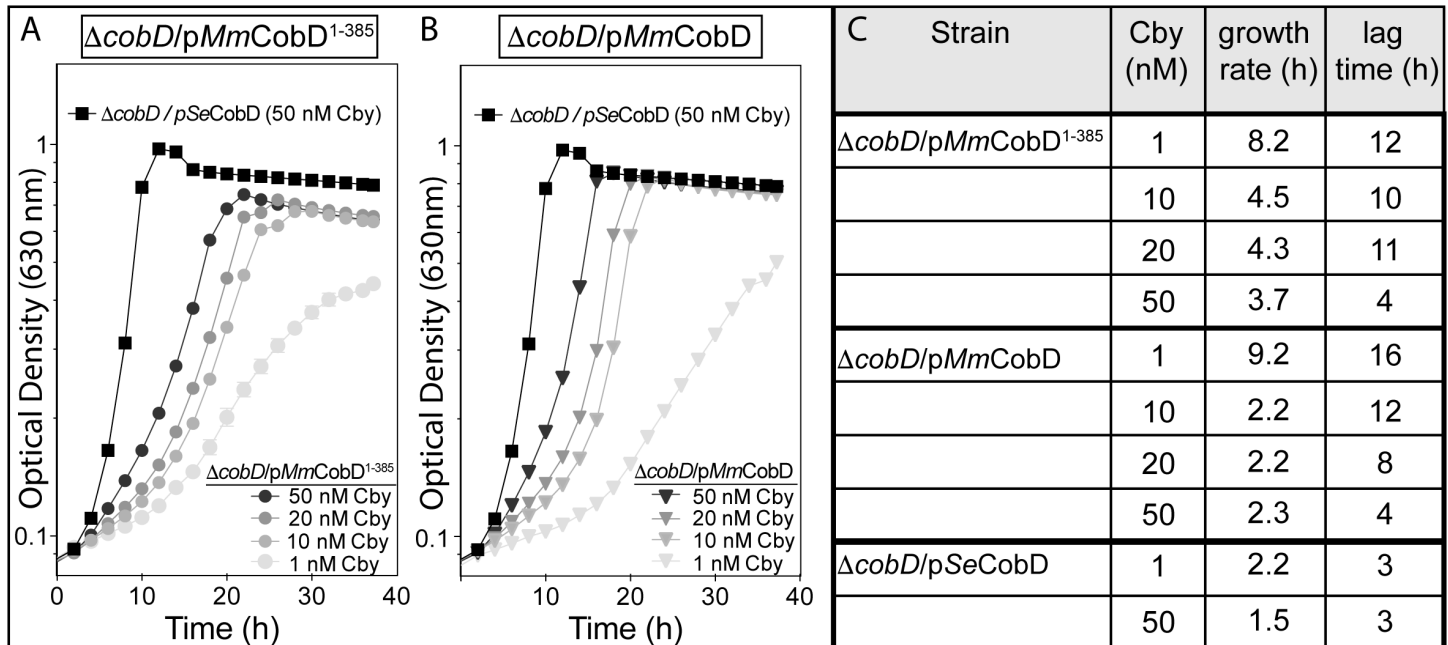

**Figure S3. *MmCobD* and *SeCobD* cannot decarboxylate L-Ser-P** - Representative  $^{13}\text{C}$ -NMR spectra of duplicate independent experiments. Spectra were processed with MestReNova (Mestrelab Research). Reaction mixtures containing sodium phosphate buffer (5 mM, pH 8.5 at 25°C),  $\text{MgCl}_2$  (5 mM), ATP (40 mM), L-Ser (40 mM), and protein (0.68  $\mu\text{M}$ ) were incubated for 1 h at 25°C prior to the addition of  $\text{D}_2\text{O}$  (17% v/v). Each panel is labeled with the substrate and or protein reaction mixture. Each peak is labeled with the chemical shift value (ppm) and a color-coded letter corresponding to the carbon atom it represents, based on the corresponding chemical shifts for the standards in the no-enzyme control reactions. (A) Reaction and chemical structures of substrates with each carbon atom labeled with a color-coded letter. (B) O-Phospho-L-serine standard (L-Ser-P; red). (C) Ethanolamine phosphate (EA-P; boxed purple). (D) Equimolar mixture of L-Ser-P and EA-P standards. (E) Reaction containing L-Ser-P and *SeCobD*. (F) Reaction containing L-Ser-P and *MmCobD*.

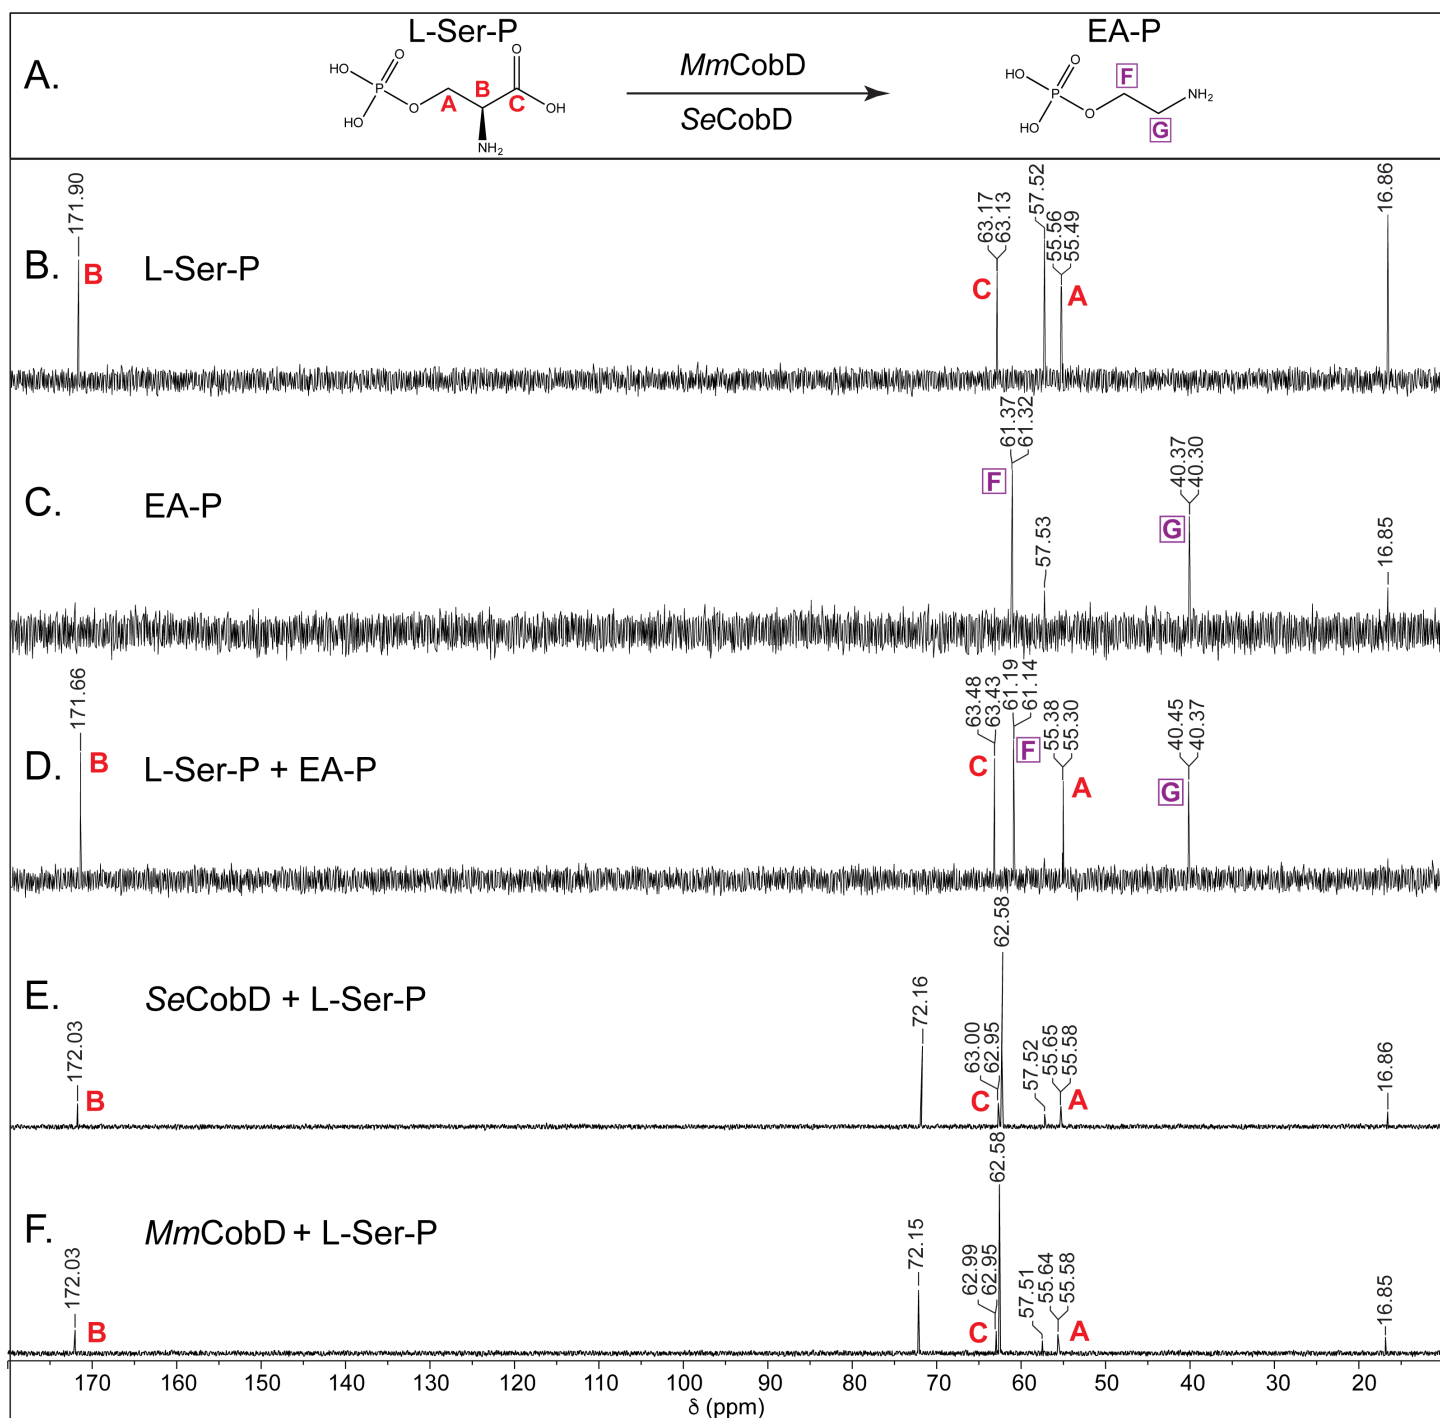

**Figure S4.** *MmCobD* cannot use *L-Ser* as a substrate - Representative  $^{13}\text{C}$ -NMR spectra of duplicate independent experiments of *MmCobD* kinase reaction. Spectra were processed with MestReNova (Mestrelab Research). Reaction mixtures containing sodium phosphate buffer (5 mM, pH 8.5 at 25°C),  $\text{MgCl}_2$  (5 mM), ATP (40 mM), *L-Ser* (40 mM), and protein (0.68  $\mu\text{M}$ ) were incubated for 1 h at 25°C prior to the addition of  $\text{D}_2\text{O}$  (17% v/v). Each panel is labeled with the substrate and or protein reaction mixture. Each peak is labeled with the chemical shift value (ppm) and a color-coded letter corresponding to the carbon atom it represents, based on the corresponding chemical shifts for the standards in the no-enzyme control reactions. (A) Reaction and chemical structures of substrates with each carbon atom labeled with a color-coded letter. (B) *L-serine* standard (*L-Ser*; green). (C) *O*-Phospho-*L-serine* standard (*L-Ser-P*; red). (D) Ethanolamine phosphate (*EA-P*; boxed purple). (E) ATP standard (blue). (F) Equimolar mixture of ATP, *L-Ser*, *L-Ser-P* and *EA-P*. (G) Reaction containing ATP, *L-Ser*, and *MmCobD*.

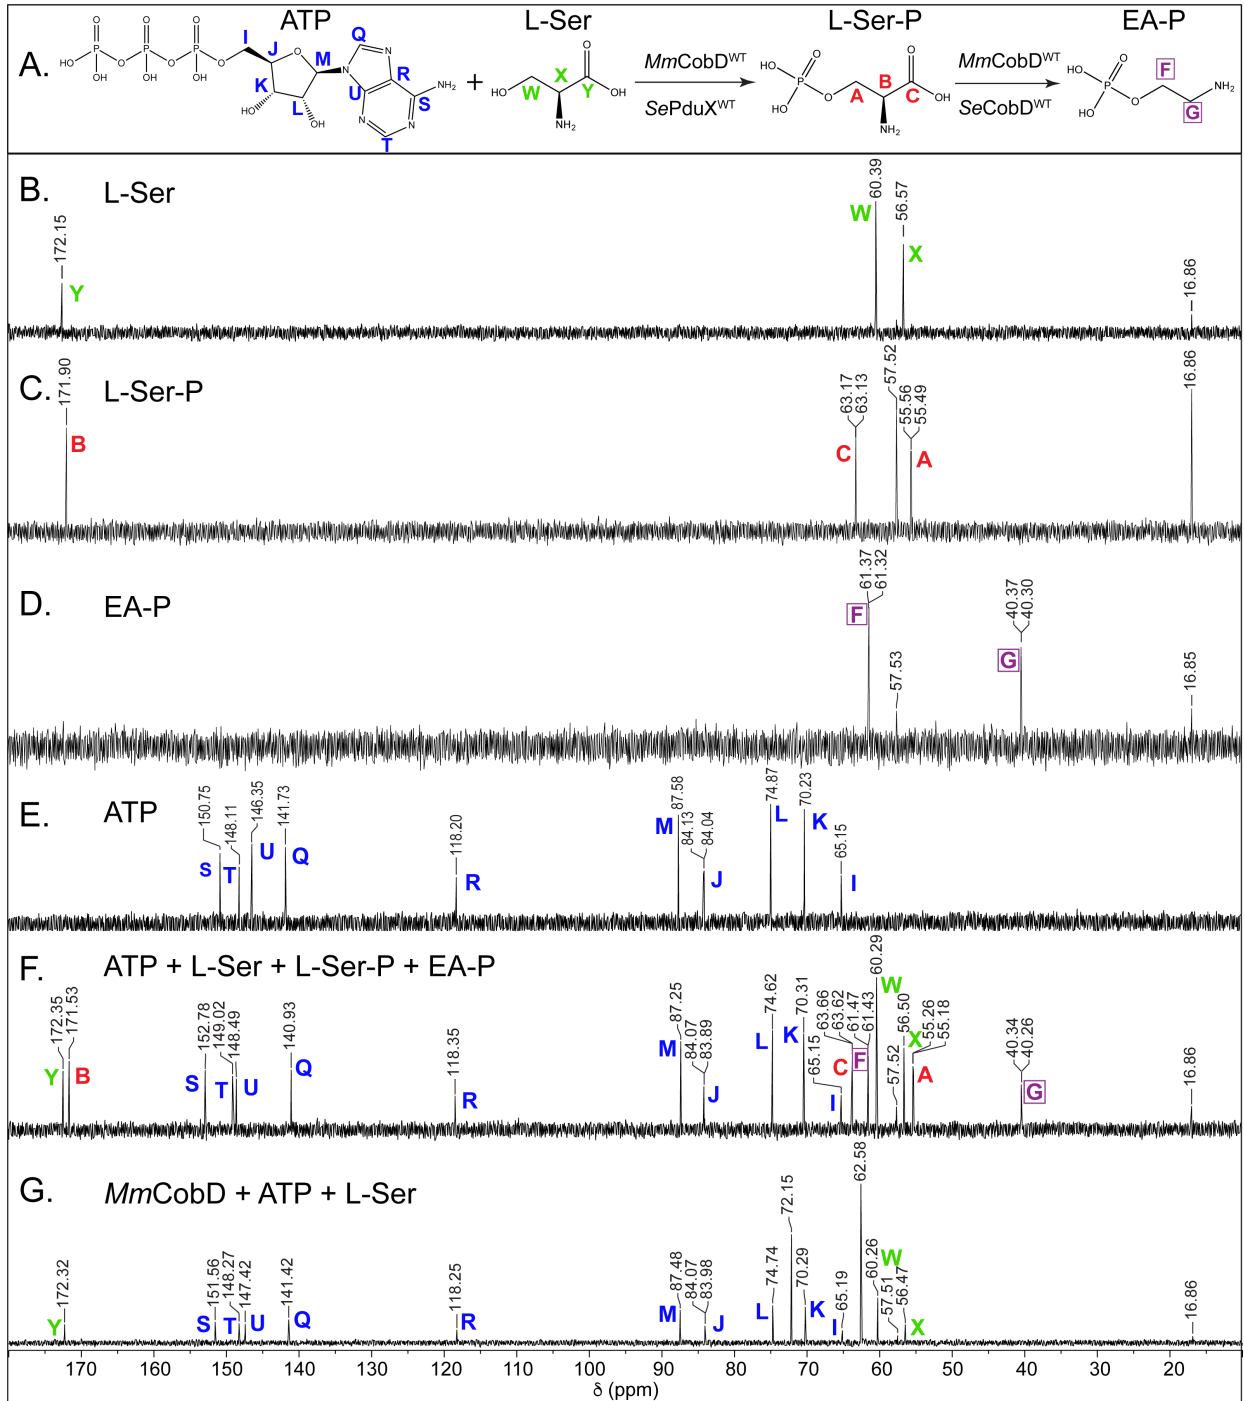

**Figure S5. Optimization of *MmCobD* reaction conditions** - ATPase activity assay measured with ADP-Glo™ Assay Kit (Promega). Values were compared to a standard curve for ATP luminescence vs conversion and converted into units of ATP produced (mM) per μM of protein, with the standard error of the mean of triplicate reactions represented by the error bars. Unless otherwise indicated, reaction mixture contained HEPES buffer (50 mM, pH 8.5 at 25°C), MgCl<sub>2</sub> (1 mM), ATP (0.1 mM), L-Thr (0.1 mM), protein (100 nM), incubated at 25°C for 1 h. (A) *MmCobD* activity as a function of pH. (B) *MmCobD* activity in the presence of salts (100 mM) or other reductants; TCEP (1 mM), sodium dithionite (1 mM). (C) *MmCobD* activity as a function of added divalent metals (1 mM). (D) Enzymatic activity of truncations and *MmCobD* in the presence of ATP (10 mM) and L-threonine (L-Thr, 50 mM) or (E) L-serine (L-Ser, 50 mM). *SeCobD* and *SePduX* proteins were used as negative and positive controls, respectively. (F) *MmCobD* activity as a function of L-threonine (L-Thr) concentration (1-100 μM). (G) *MmCobD* activity as a function of ATP concentration (1 - 100 μM) with L-Thr (50 mM). (H) *MmCobD* (6 μM) activity in the presence of ATPase/kinase inhibitors ADP (200 mM), AMP (200 mM), sodium pyrophosphate (PPi, 10 mM), sodium triphosphate (PPPi, 10 mM), adenosine 5'-[γ-thio]triphosphate (ADP-γ-S, 0.1 mM), sodium *ortho*-vanadate (Na<sub>3</sub>VO<sub>4</sub>, 1 mM), and sodium beryllium fluoride (BeF<sub>2</sub>, 2 mM) in HEPES buffer (50 mM, pH 7.5 at 25°C). (I) *MmCobD* and *MmCobD*<sup>1-385</sup> activity in the presence ADP-γ-S, (0.1 mM). *SeEtuP* acetate kinase was used as a positive control; protein concentrations (0.1 mM).

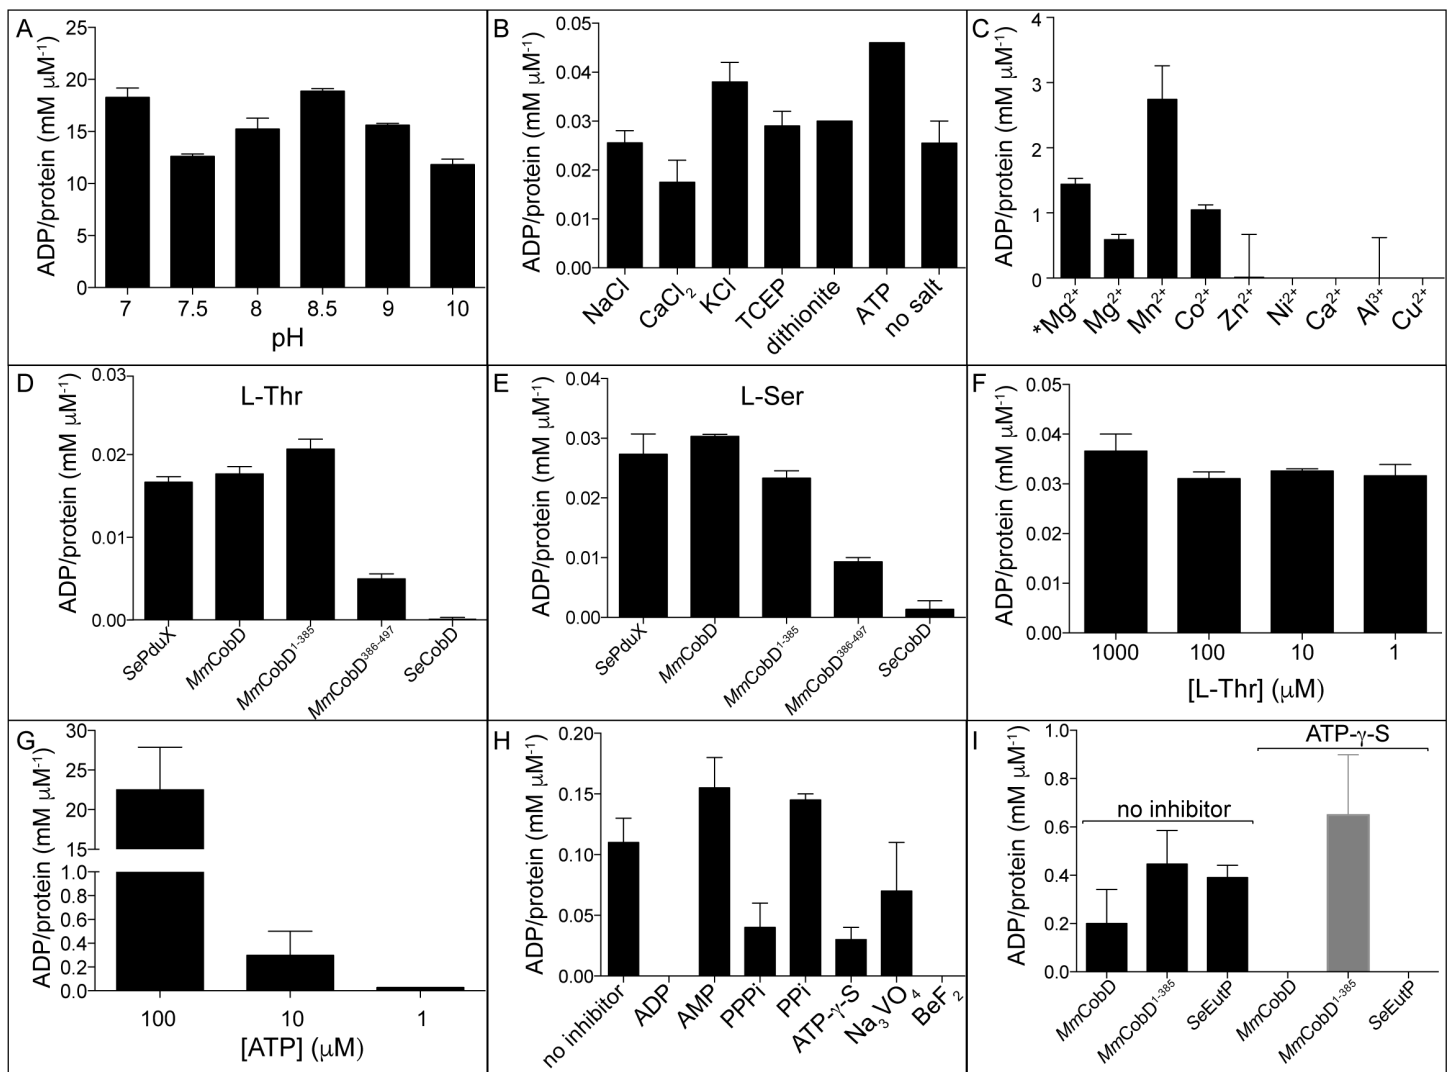

Figure S6. Gel permeation analysis for the determination of the oligomeric state of *MmCobD* proteins - Gel filtration analysis of *MmCobD* and truncated variants. Samples were applied to a HiPrep 26/60 Sephacryl S-100 High-resolution gel filtration column using isocratic elution with sodium phosphate (50 mM, pH 7.4 at 4°C) containing NaCl (150 mM). Calibration was performed with Bio-Rad gel filtration standards supplemented with BSA and DNaseI with linear regression to generate the standard curve. *MmCobD* and *MmCobD*<sup>1-385</sup> correspond to the approximate molecular mass of a dimer and *MmCobD*<sup>386-497</sup> corresponds to the molecular mass of a monomer.

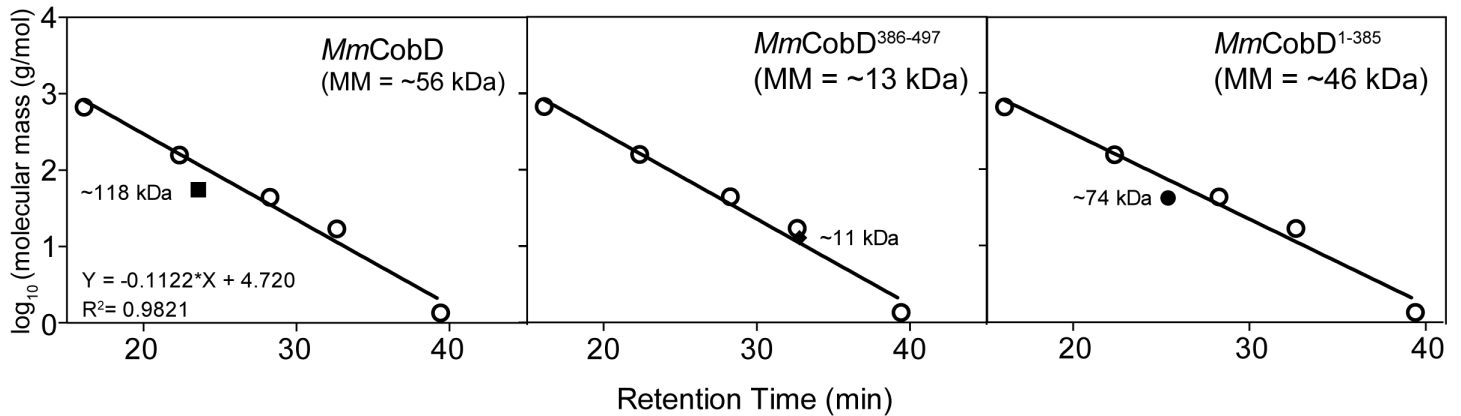

Figure S7. Purification of *MmCobD* proteins - SDS-PAGE gel of proteins purified normoxically. Lane (1) *MmCobD*, (2) *MmCobD*<sup>1-385</sup>, (3) *MmCobD*<sup>386-497</sup>, (4) *SeCobD*. Molecular mass markers are shown on the left most lane. Red letters identify (a) high and (b) low molecular weight proteins analyzed by MALDI TOF (see Fig. S8).

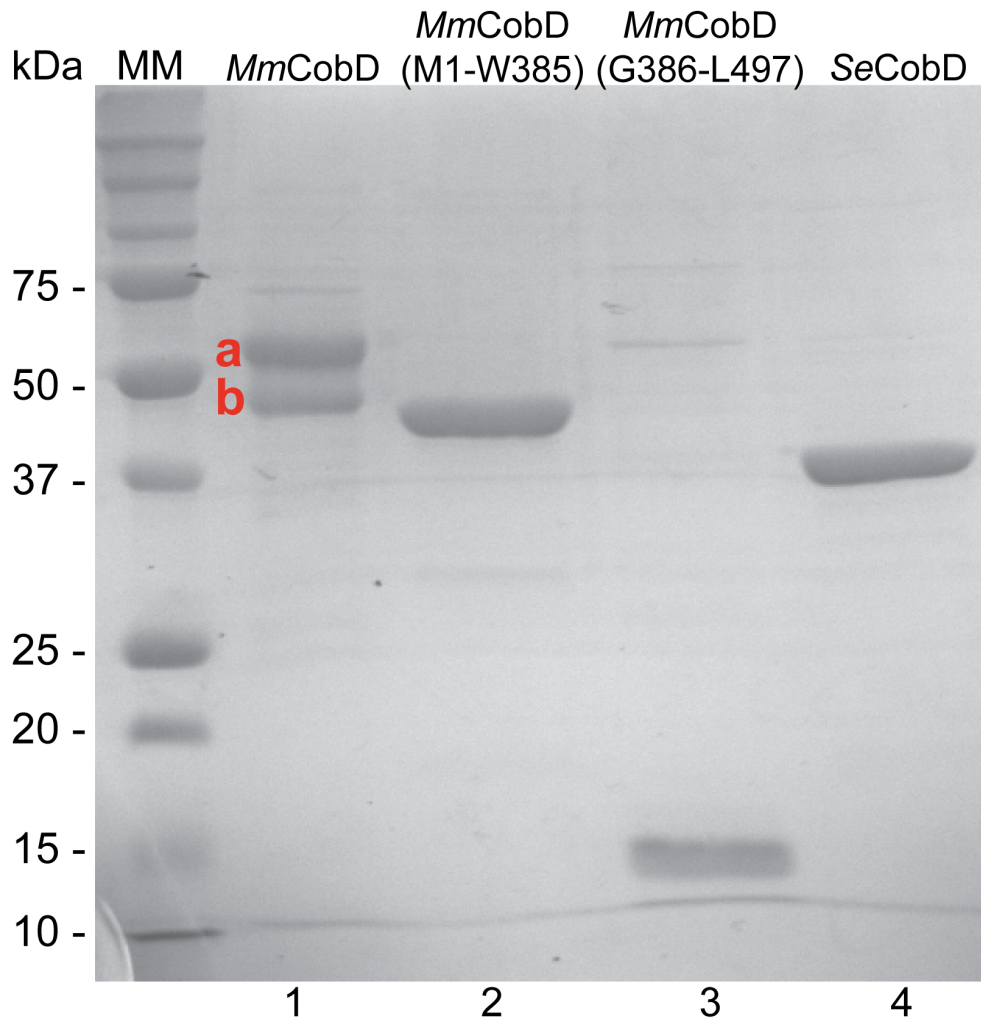

Figure S8. MALDI TOF analysis of *MmCobD* proteins. Panels A and B show the mass spectra of bands labeled **a** and **b** in lane 1 of Fig. S7. Panels C and D show the coverage of the analysis, which identified these proteins as *MmCobD*.

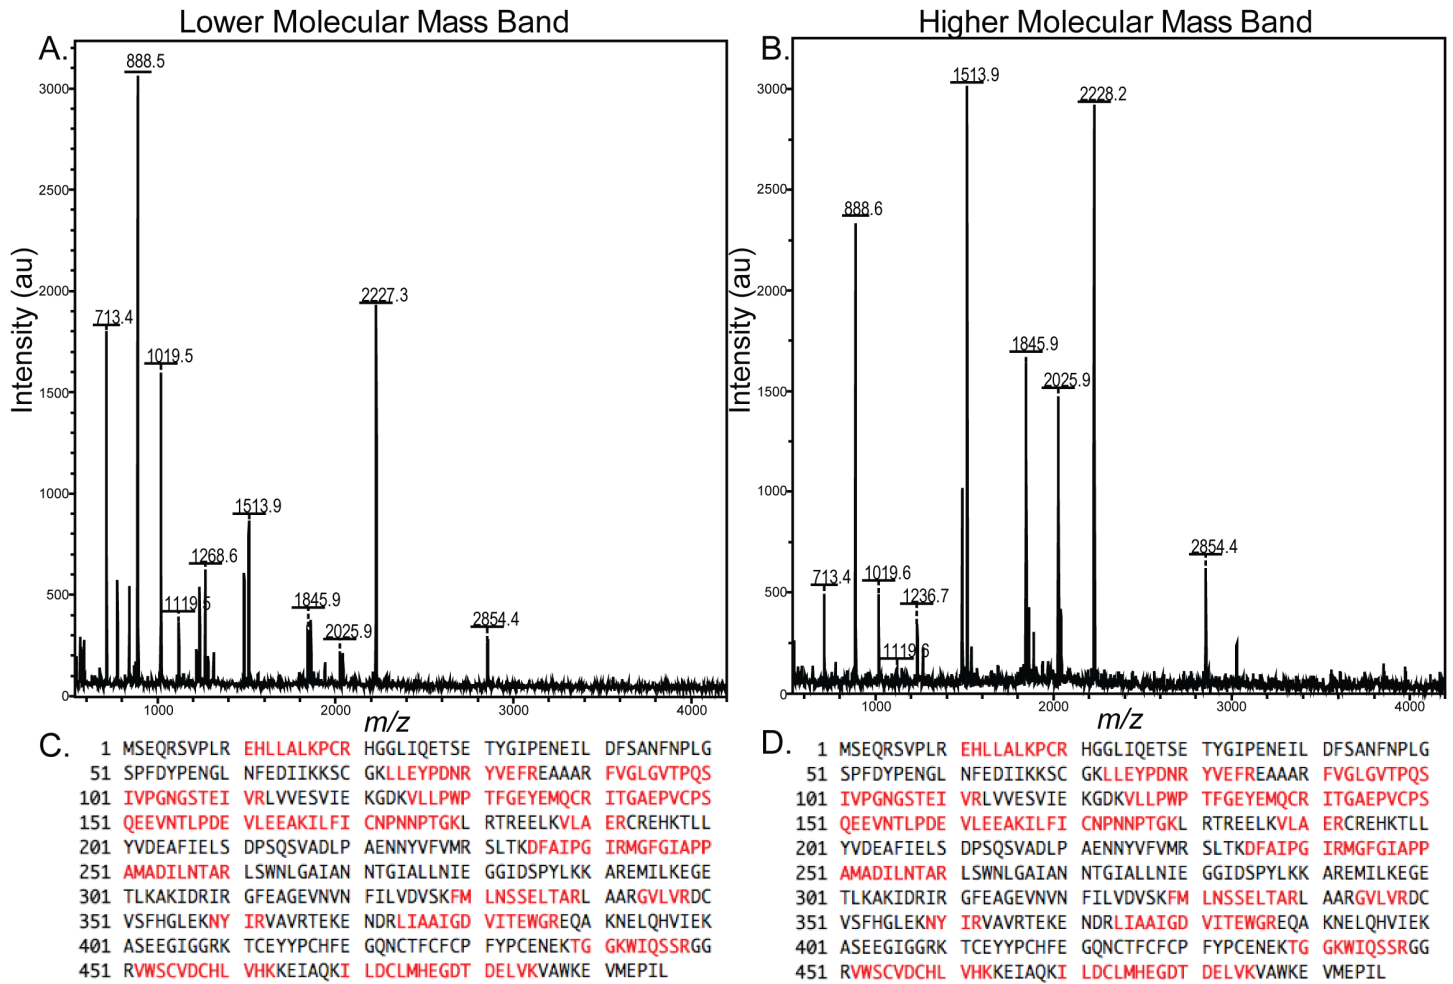



## SUPPORTING TABLES

Table S1. Strains and plasmids list - *S. enterica* strains are derivatives of sv. Typhimurium strain LT2. Strains and plasmids were constructed during the course of this work unless stated otherwise.

| Strains                           | Relevant genotype                                                                                                                                                                                                                                   | Reference / Source    |
|-----------------------------------|-----------------------------------------------------------------------------------------------------------------------------------------------------------------------------------------------------------------------------------------------------|-----------------------|
| <b><i>Salmonella enterica</i></b> |                                                                                                                                                                                                                                                     |                       |
| JE7088                            | $\Delta metE2702 ara-9$                                                                                                                                                                                                                             | Laboratory collection |
| <b>Derivatives of JE7088</b>      |                                                                                                                                                                                                                                                     |                       |
| JE21644                           | / pBAD24 <i>bla</i> <sup>+</sup>                                                                                                                                                                                                                    |                       |
| JE21557                           | / pTEV5 <i>bla</i> <sup>+</sup>                                                                                                                                                                                                                     |                       |
| JE12656                           | <i>pduX516</i>                                                                                                                                                                                                                                      |                       |
| JE16777                           | <i>pduX516 cobD1371</i>                                                                                                                                                                                                                             |                       |
| JE2216                            | <i>cobD1302::Tn10d(cat</i> <sup>+</sup> )                                                                                                                                                                                                           | Laboratory collection |
| JE21654                           | <i>cobD1302::Tn10d(cat</i> <sup>+</sup> ) / pBAD24 <i>bla</i> <sup>+</sup>                                                                                                                                                                          |                       |
| JE21653                           | <i>cobD1302::Tn10d(cat</i> <sup>+</sup> ) / pTEV5 <i>bla</i> <sup>+</sup>                                                                                                                                                                           |                       |
| JE6158                            | <i>cobD1302::Tn10d(cat</i> <sup>+</sup> ) / pCOBD6 <i>bla</i> <sup>+</sup>                                                                                                                                                                          | Laboratory collection |
| JE21656                           | <i>cobD1302::Tn10d(cat</i> <sup>+</sup> ) / pMmCOBD7 <i>bla</i> <sup>+</sup>                                                                                                                                                                        |                       |
| JE21781                           | <i>cobD1302::Tn10d(cat</i> <sup>+</sup> ) / pMmCOBD9 <i>bla</i> <sup>+</sup>                                                                                                                                                                        |                       |
| JE21657                           | <i>cobD1302::Tn10d(cat</i> <sup>+</sup> ) / pMmCOBD13 <i>bla</i> <sup>+</sup>                                                                                                                                                                       |                       |
| JE21646                           | <i>cobD1302::Tn10d(cat</i> <sup>+</sup> ) / pMmCOBD17 <i>bla</i> <sup>+</sup>                                                                                                                                                                       |                       |
| JE21659                           | <i>cobD1302::Tn10d(cat</i> <sup>+</sup> ) / pMmCOBD18 <i>bla</i> <sup>+</sup>                                                                                                                                                                       |                       |
| JE21782                           | <i>cobD1302::Tn10d(cat</i> <sup>+</sup> ) / pMmCOBD19 <i>bla</i> <sup>+</sup>                                                                                                                                                                       |                       |
| JE18765                           | <i>pduX516</i> / pMmCOBD7 <i>bla</i> <sup>+</sup>                                                                                                                                                                                                   |                       |
| JE21619                           | <i>pduX516</i> / pMmCOBD9 <i>bla</i> <sup>+</sup>                                                                                                                                                                                                   |                       |
| JE18970                           | <i>pduX516</i> / pMmCOBD13 <i>bla</i> <sup>+</sup>                                                                                                                                                                                                  |                       |
| JE19204                           | <i>pduX516</i> / pMmCOBD17 <i>bla</i> <sup>+</sup>                                                                                                                                                                                                  |                       |
| JE21336                           | <i>pduX516</i> / pMmCOBD18 <i>bla</i> <sup>+</sup>                                                                                                                                                                                                  |                       |
| JE19205                           | <i>pduX516</i> / pMmCOBD19 <i>bla</i> <sup>+</sup>                                                                                                                                                                                                  |                       |
| JE16786                           | <i>pduX516 cobD1371</i> / pBAD24 <i>bla</i> <sup>+</sup>                                                                                                                                                                                            |                       |
| JE19200                           | <i>pduX516 cobD1371</i> / pMmCOBD17 <i>bla</i> <sup>+</sup>                                                                                                                                                                                         |                       |
| <b><i>Escherichia coli</i></b>    |                                                                                                                                                                                                                                                     |                       |
| C43 ( $\lambda$ DE3)              | F <sup>-</sup> <i>ompT gal hsdS<sub>B</sub> (rB<sup>-</sup>mB) [dcm] [lon]</i>                                                                                                                                                                      | <sup>1</sup>          |
| DH5 $\alpha$                      | F <sup>-</sup> / <i>endA1 hsdR17(rk<sup>-</sup>, mk<sup>+</sup>) glnV44 thi-1 recA1 gyrA96 (Nx<sup>R</sup>) relA1 U169 deoR (<math>\Phi</math>80d <i>lacZ</i> <math>\Delta</math>M15 <math>\Delta</math>(<i>lacZYA-argF</i>) <i>phoA supE44</i></i> | <sup>2</sup>          |
| <b>Plasmids</b>                   |                                                                                                                                                                                                                                                     |                       |
| pCOBD6                            | <i>S. enterica cobD</i> <sup>+</sup> in pT7-7 <i>bla</i> <sup>+</sup>                                                                                                                                                                               | Laboratory collection |
| pMmCOBD7                          | <i>M. mazei cobD19</i> (encoding <i>MmCobD</i> <sup>1-385</sup> ) in pBAD24 <i>bla</i> <sup>+</sup>                                                                                                                                                 |                       |
| pMmCOBD9                          | <i>M. mazei cobD19</i> (encoding <i>MmCobD</i> <sup>1-385</sup> ) in pTEV5 <i>bla</i> <sup>+</sup>                                                                                                                                                  |                       |
| pMmCOBD13                         | <i>M. mazei cobD20</i> (encoding <i>MmCobD</i> <sup>386-497</sup> ) in pBAD24 <i>bla</i> <sup>+</sup>                                                                                                                                               |                       |
| pMmCOBD17                         | <i>M. mazei cobD</i> <sup>+</sup> in pBAD24 <i>bla</i> <sup>+</sup>                                                                                                                                                                                 |                       |
| pMmCOBD18                         | <i>M. mazei cobD</i> <sup>+</sup> in pTEV5 <i>bla</i> <sup>+</sup>                                                                                                                                                                                  |                       |
| pMmCOBD19                         | <i>M. mazei cobD20 cobD</i> <sup>386-497</sup> in pTEV5 <i>bla</i> <sup>+</sup>                                                                                                                                                                     |                       |
| pPDU15                            | <i>S. enterica pduX</i> <sup>+</sup> in pBAD30 <i>bla</i> <sup>+</sup>                                                                                                                                                                              | Laboratory collection |
| pPDU23                            | <i>S. enterica pduX</i> <sup>+</sup> in pTEV5 <i>bla</i> <sup>+</sup>                                                                                                                                                                               | Laboratory collection |
| pBAD24                            | cloning/complementation vector <i>bla</i> <sup>+</sup>                                                                                                                                                                                              | <sup>3</sup>          |
| pBAD30                            | cloning/complementation vector <i>bla</i> <sup>+</sup>                                                                                                                                                                                              | <sup>3</sup>          |
| pTEV5                             | cloning/overexpression vector, N-terminal rTEV cleavable His <sub>6</sub> tag <i>bla</i> <sup>+</sup>                                                                                                                                               | <sup>4</sup>          |

Table S2. Primers used in this study - Restriction sites are indicated in boldface type.

| Name                      | Sequence                                                       |
|---------------------------|----------------------------------------------------------------|
| <b>Deletion primers</b>   |                                                                |
| cobD_wan5'_b              | CAGTTACTGGATTTTAGCGCAAACATTAATCCGCTGGGTATGGTGTAGGCTGGAGCTGCTTC |
| cobD_wan3'_b              | ACTACATCAATCAGCAGGGGCTATACCGGTAAGCACATTCATATGAATATCCTCCTTAG    |
| pduX_wan5'_b              | ATGCGCGCACACTATTCGTACCTGAAAGGTGATAATGTGGTGTAGGCTGGAGCTGCTTC    |
| pduX_wan3'_b              | GCCAGTGACCATCTTGAGTAAATGTTGTTTTGGCCAGTGCATATGAATATCCTCCTTAG    |
| <b>Cloning primers</b>    |                                                                |
| pduX_KpnI5'               | TAGGGGTACCATGCGCGCACACTATTCGTA                                 |
| pduX_Hind3'               | TAGGAAGCTTTCACTGCAGTTTGACCCCG                                  |
| CobD-Nhe5'                | TAGGGCTAGCATGGCGTTATTCAACAGCG                                  |
| CobD-SacI3'               | TAGGGAGCTCTCAATCAGCAGGGGCTATAACC                               |
| MmCobD_Nhe5'              | TAGGGCTAGCATGTCAGAGCAAAGAAGTGTACCT                             |
| MmCobD_Sma3'              | TAGGCCCGGGTCATAAGATAGGCTCCATCACTTCTTTC                         |
| MmCobD_short_Kpn5'        | TAGGGGTACCATGTCAGAGCAAAGAAGTGTACCT                             |
| MmCobD_short_Nhe5'        | TAGGGCTAGCATGTCAGAGCAAAGAAGTGTACCT                             |
| MmCobD_short_Hind3'       | TAGGAAGCTTTTTATTACCATTCGGTGATAACGTCC                           |
| MmCobDzf_NheI5'           | TAGGGCTAGCATGGGCAGAGAACAGGCAA                                  |
| MmCobDzf_SacI3'           | TAGGGAGCTCTCATAAGATAGGCTCCATCACTTC                             |
| <b>Sequencing primers</b> |                                                                |
| pduX_flank5'              | GCGTAATGCGACATTTATCCA                                          |
| pduX_flank3'              | TGAGGCGATTCAGGGTATCAT                                          |
| cobD_flank5'              | CGACATTGGCCTCGGTTT                                             |
| cobD_flank3'              | GAAACGCCCTGGCTTAAT                                             |

## REFERENCES

- [1] Miroux, B., and Walker, J. E. (1996) Over-production of proteins in *Escherichia coli*: mutant hosts that allow synthesis of some membrane proteins and globular proteins at high levels, *J. Mol. Biol.* 260, 289-298.
- [2] Woodcock, D. M., Crowther, P. J., Doherty, J., Jefferson, S., De Cruz, E., Noyer-Weidner, M., Smith, S. S., Michael, M. Z., and Graham, M. W. (1989) Quantitative evaluation of *Escherichia coli* host strains for tolerance to cytosine methylation in plasmid and phage recombinants, *Nucl. Acids Res.* 17, 3469-3478.
- [3] Guzman, L. M., Belin, D., Carson, M. J., and Beckwith, J. (1995) Tight regulation, modulation, and high-level expression by vectors containing the arabinose PBAD promoter, *J. Bacteriol.* 177, 4121-4130.
- [4] Rocco, C. J., Dennison, K. L., Klenchin, V. A., Rayment, I., and Escalante-Semerena, J. C. (2008) Construction and use of new cloning vectors for the rapid isolation of recombinant proteins from *Escherichia coli*, *Plasmid* 59, 231-237.
